# Supplementary material
Source: Springer Nature journal article supplement (https://www.springermedizin.de/resource/supplementary/12936_2007_436_MOESM4_ESM.pdf/9547446)

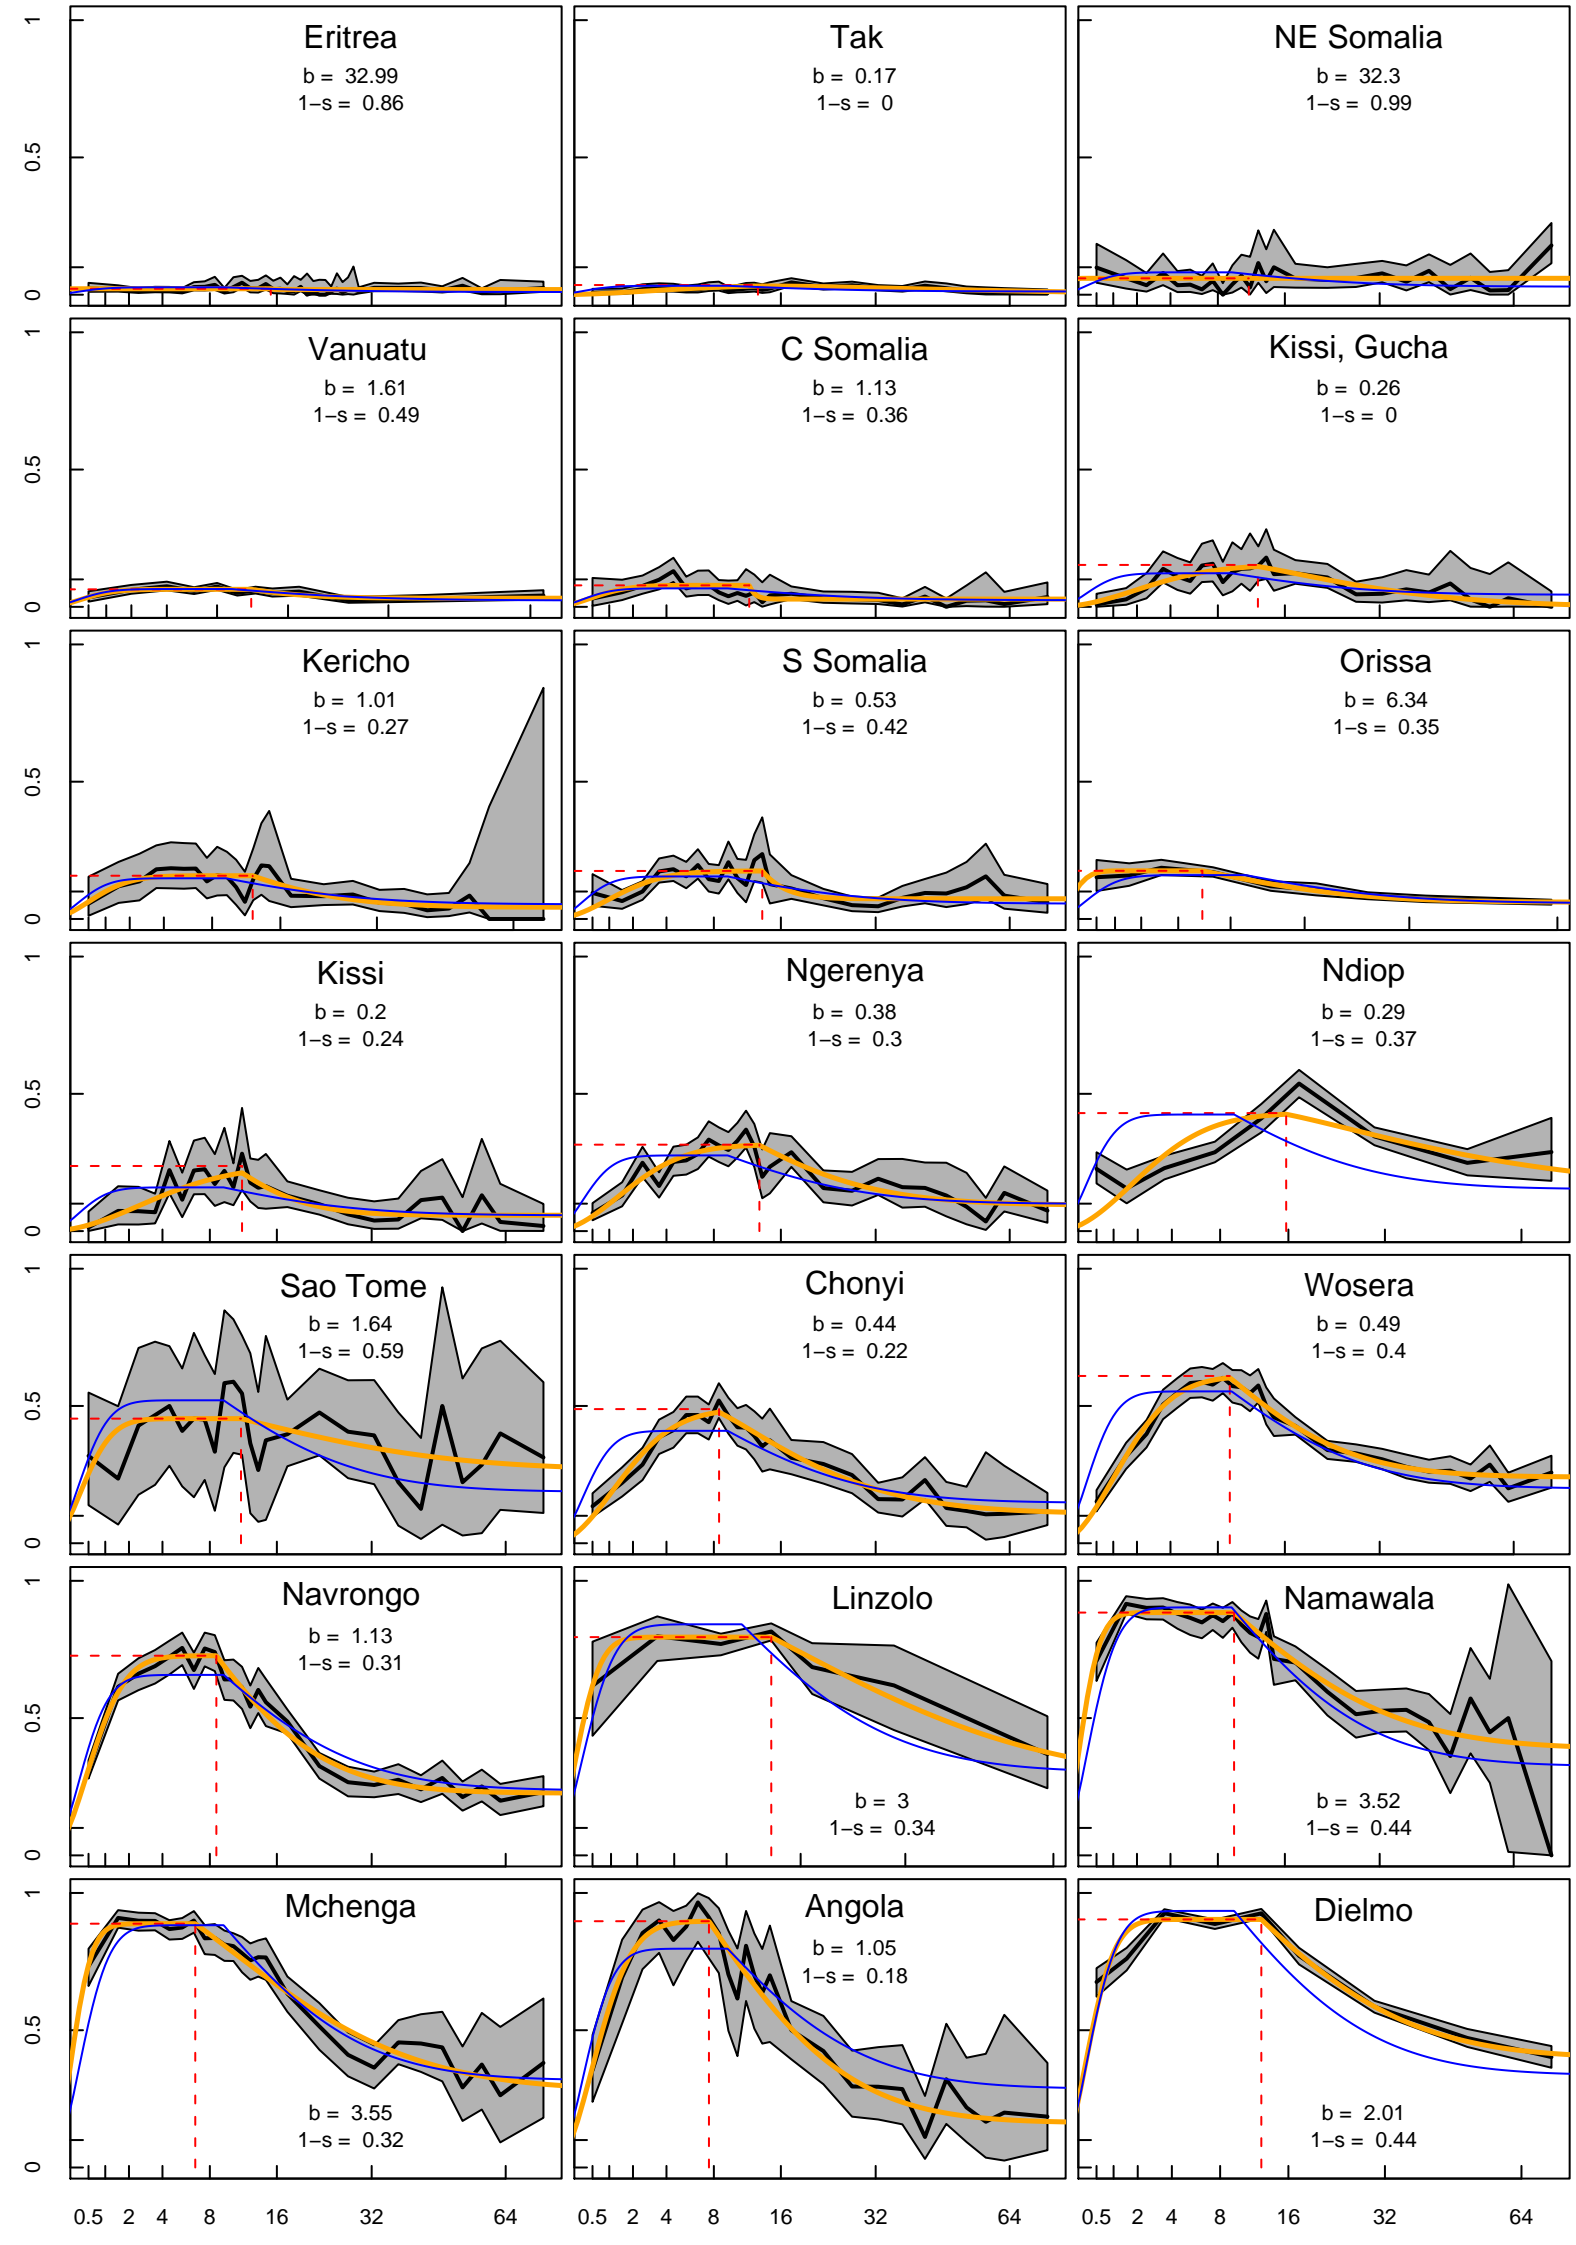

Supplement: MOESM4 [file 9547446]
